# Supplementary material for: Antifungal Activity of Eclipta alba Metabolites against Sorghum Pathogens
Source: PubMed Central journal article supplement (PMC6473702; doi:10.3390/plants8030072), 2019-03-22
Supplement: plants-08-00072-s001.pdf [file plants-08-00072-s001.pdf]

## Supplementary

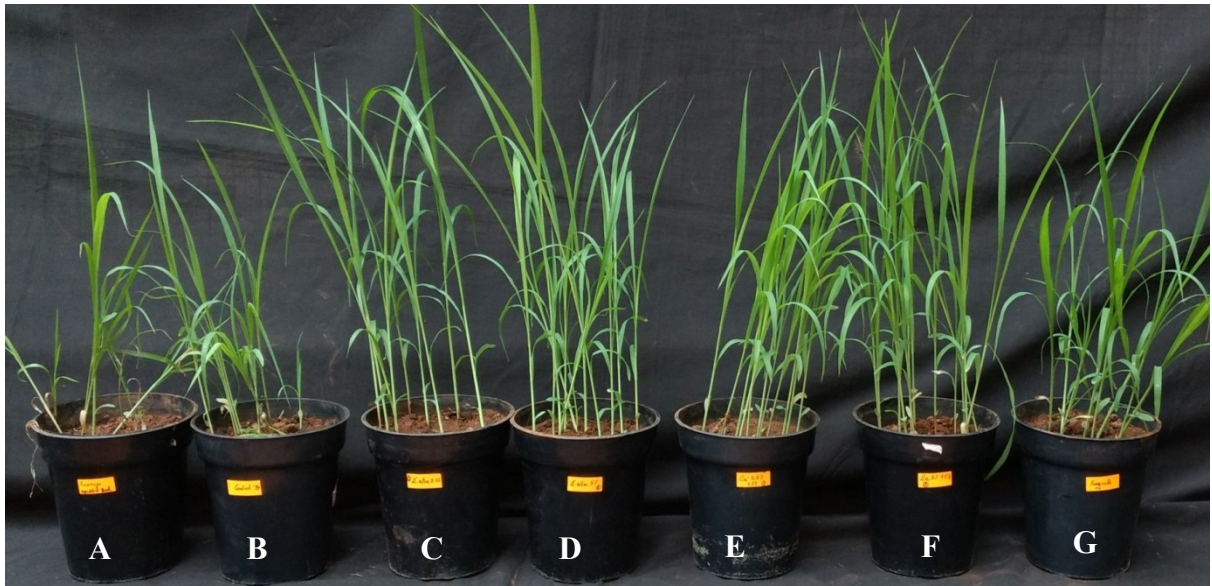

**Figure S1.** Effect of seed treatment with *E. alba* extract (120mg/ml) on emergence of seedlings for seeds infected with **A.** Pathogen control (*F. thapsinum*) **B.** Water treated control **C.** Bavistin treated **D.** *F. thapsinum* **E.** *E. sorghinum* **F.** *A. alternata* **G.** *C. lunata*.

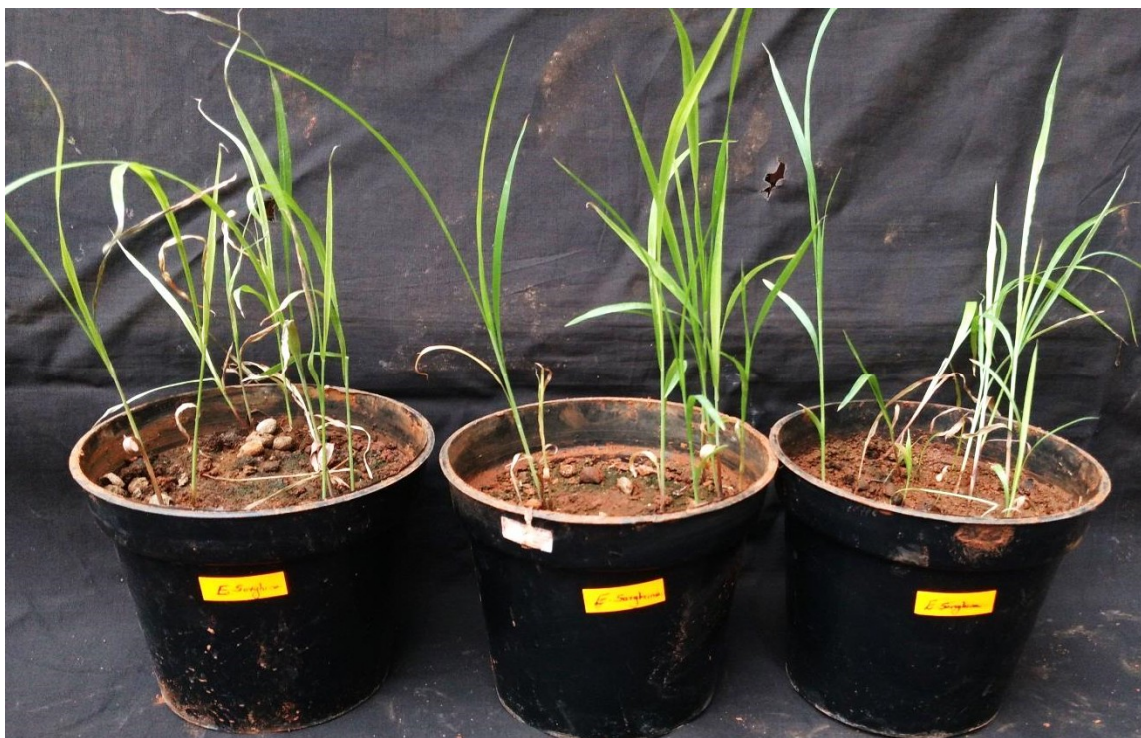

**Figure S1a.** *F. thapsinum* infected plants.

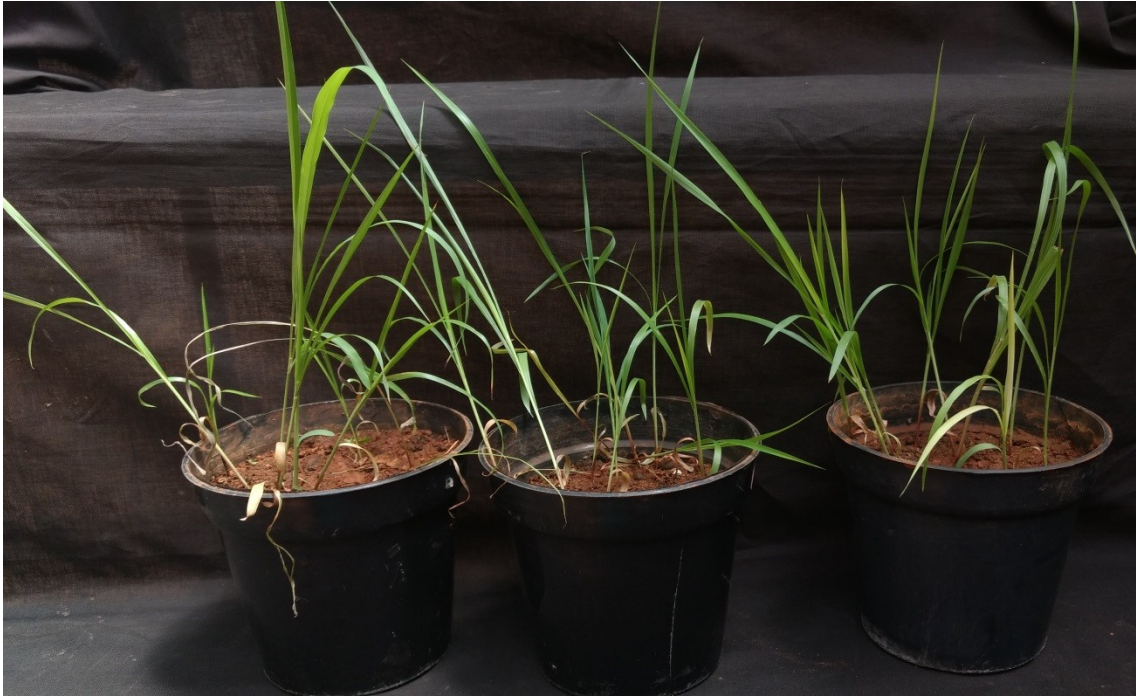

**Figure S1b.** *E. sorghinum* infected plants.

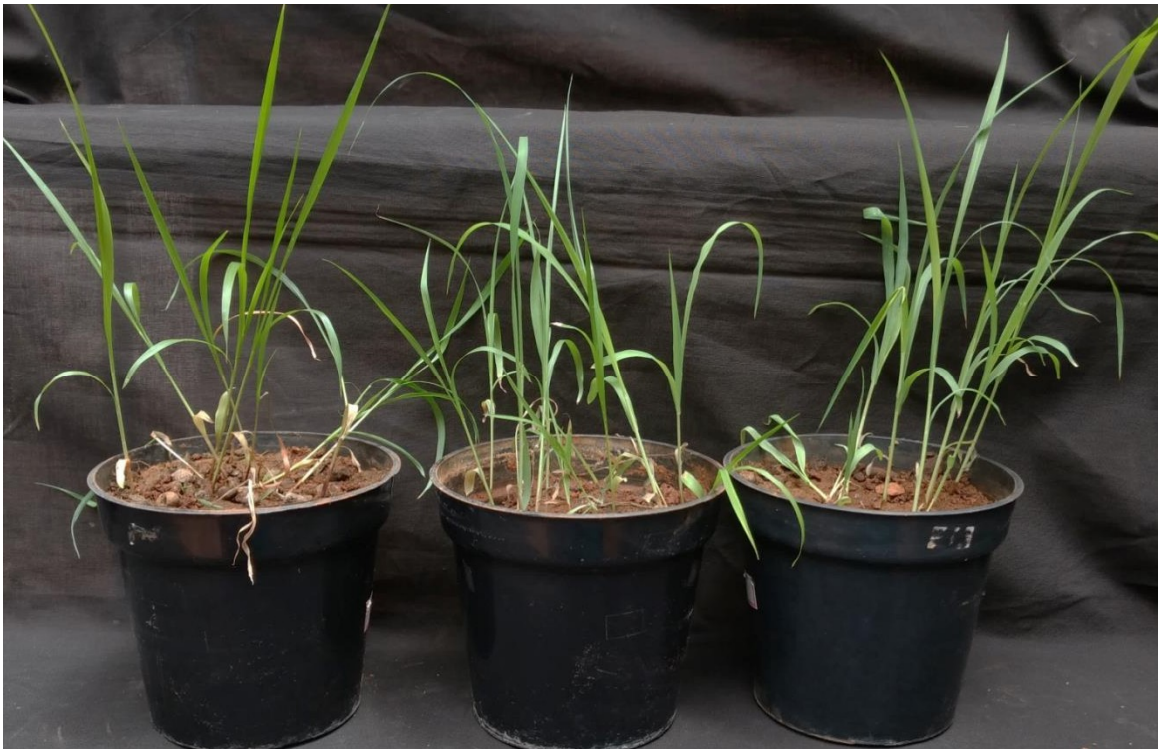

**Figure S1c.** *A. alternata* infected plants.

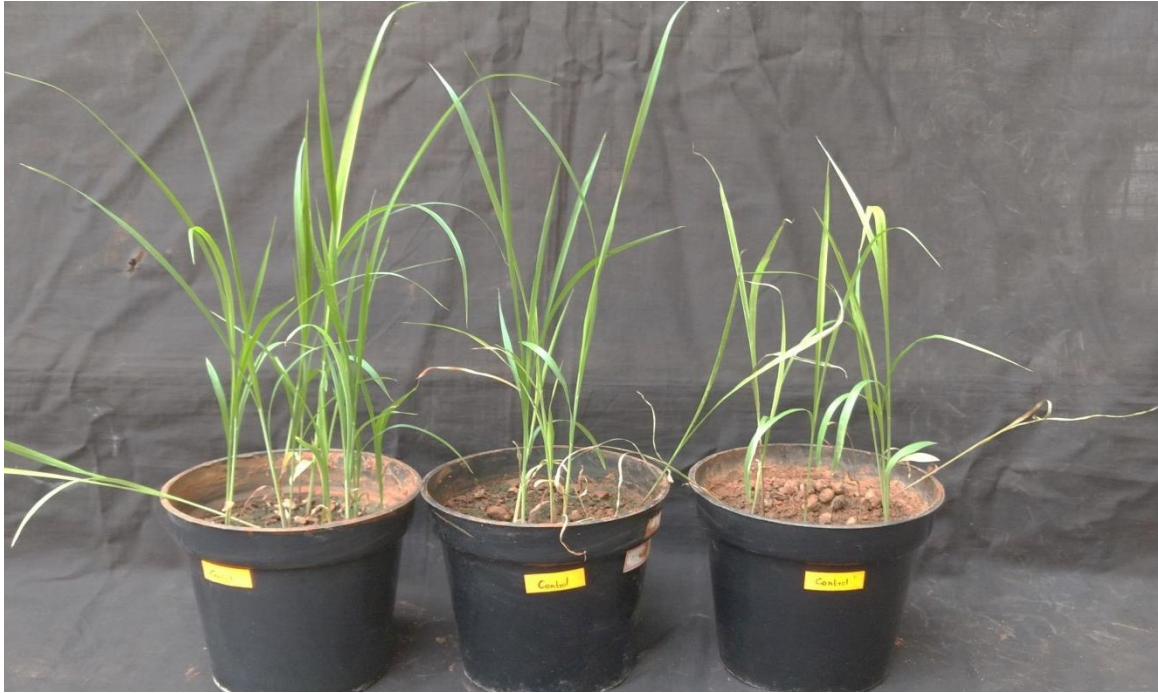

**Figure S1d.** *C. lunata* infected plants.

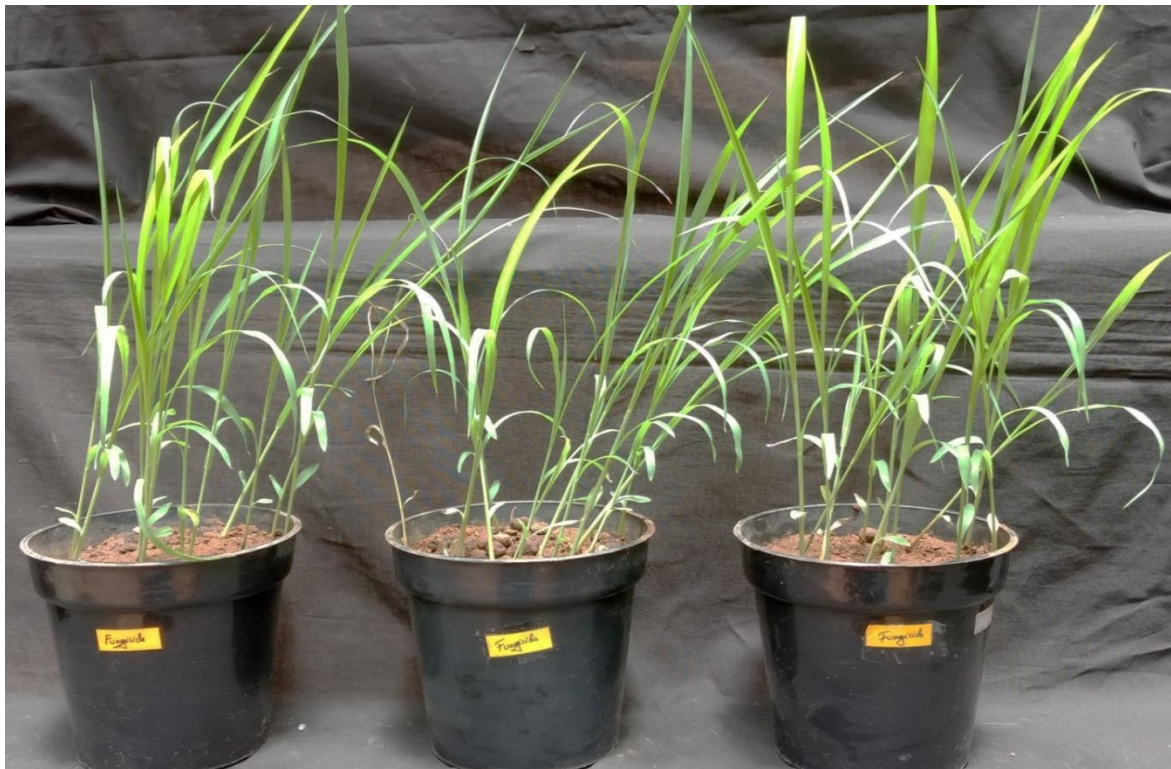

**Figure S1e.** Fungicide treated plants.

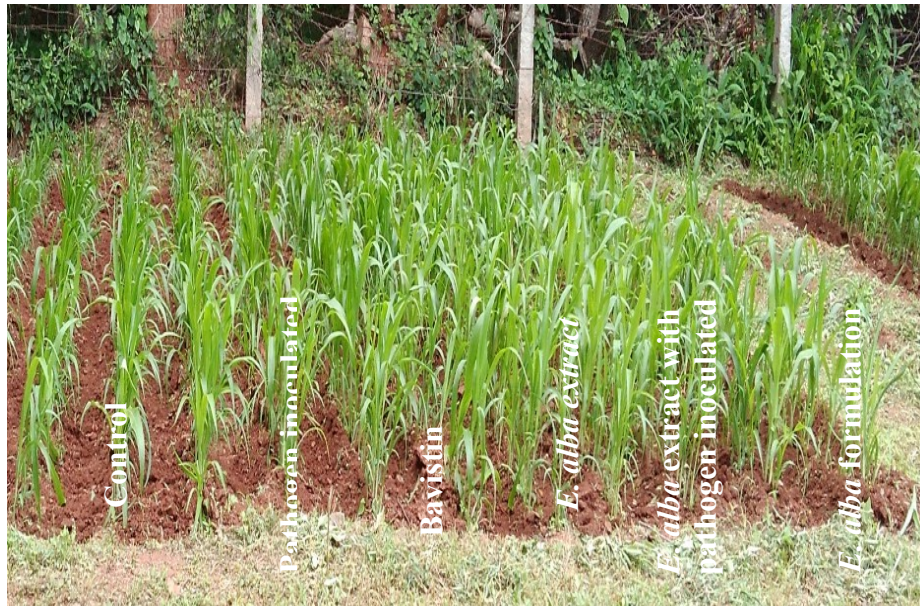

**Figure S2. (a).** Effect of seed treatment on performance of sorghum in field trials by randomized block design (30 DAS).

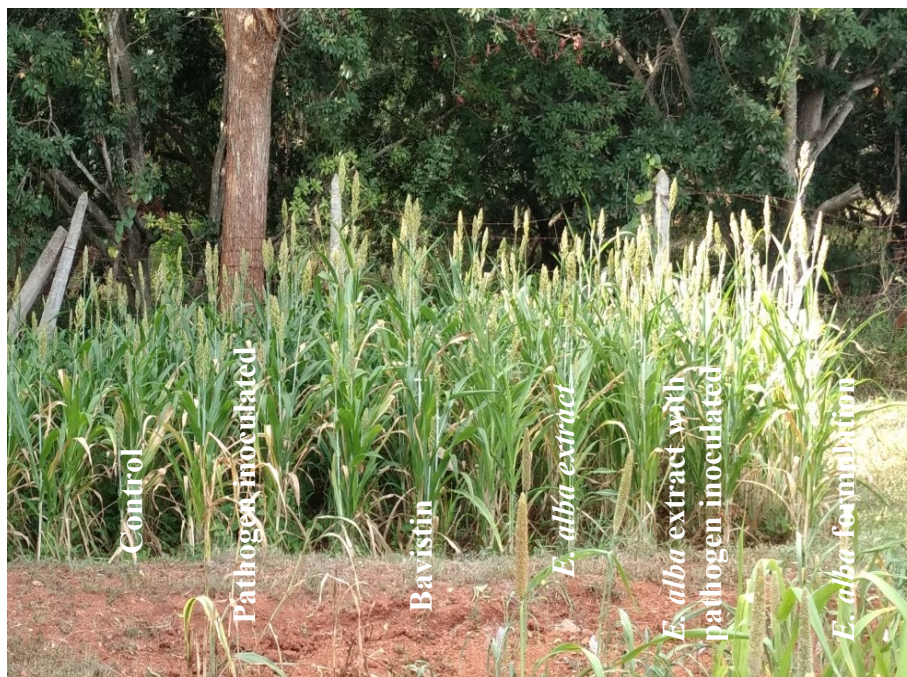

**Figure S2. (b).** Effect of seed treatment on performance of sorghum in field trials by randomized block design (60 DAS).

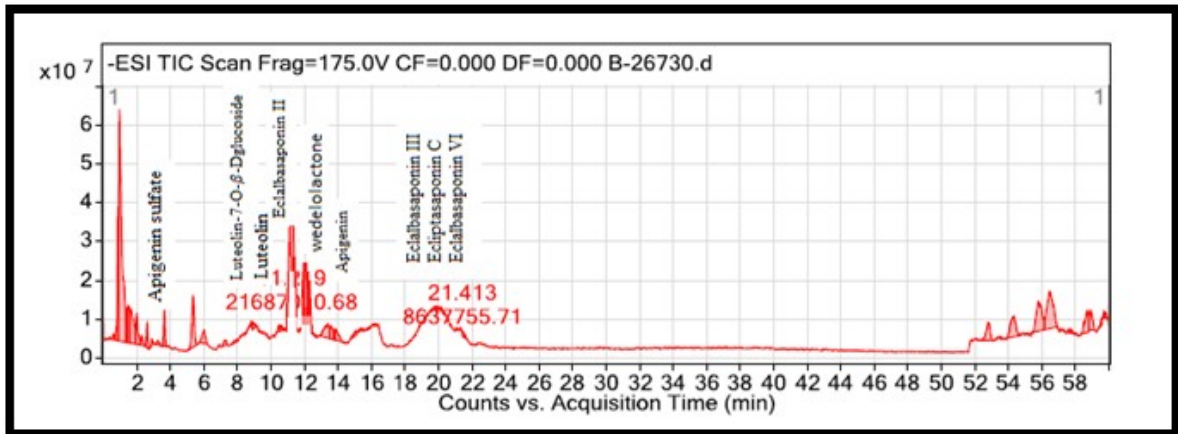

Figure S3. UPLC MS/MS full scan  $m/z$  100–1700 spectra of *E. alba* column purified sample.

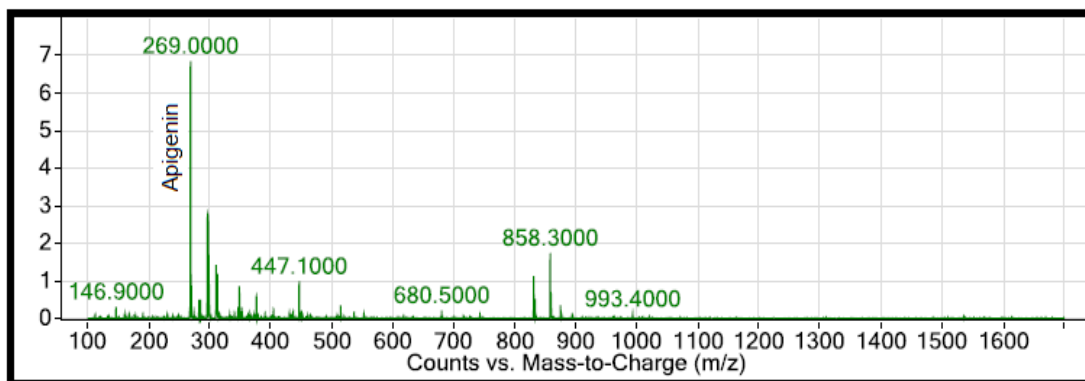

(a)

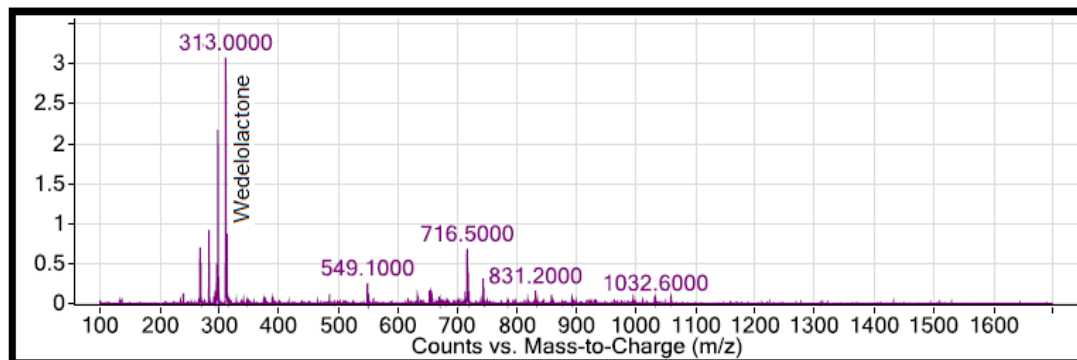

(b)

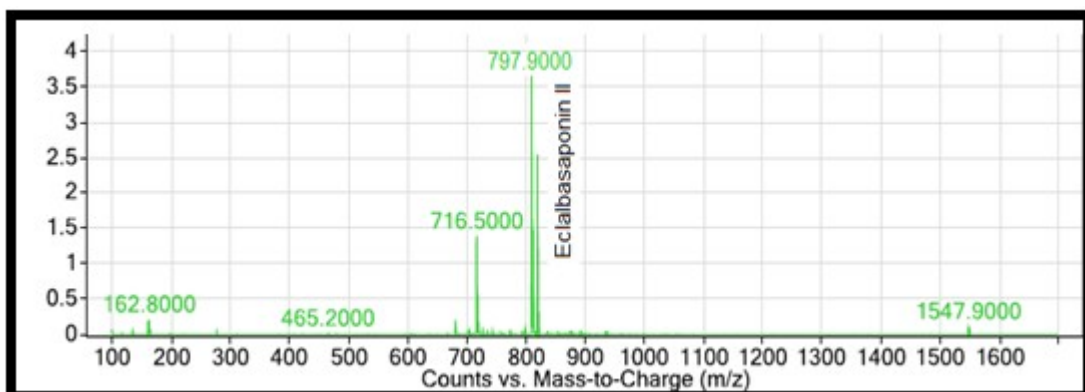

(c)

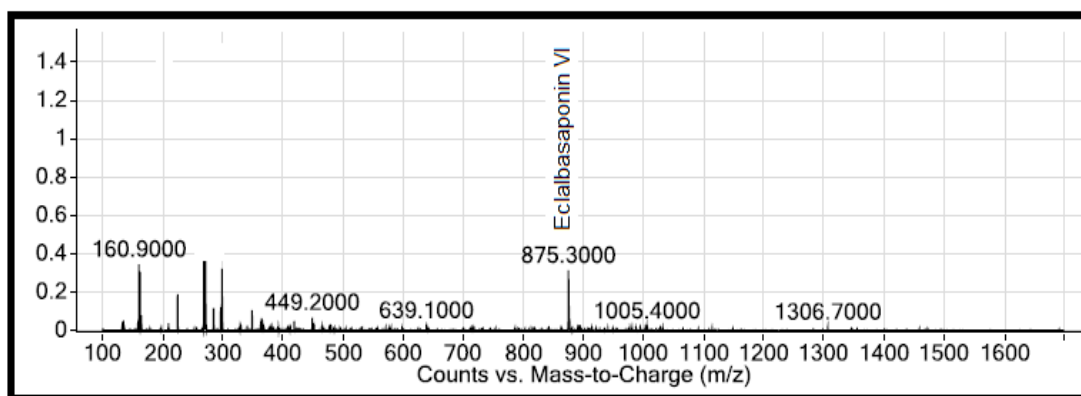

(d)

**Figure S4.** Mass chromatography data of (a) Apigenin, (b) Wedelolactone, (c) Eclalbasaponin II and (d) EclalbasaponinVI.

**Table S1.** Major peaks retention time and peak area of column purified fraction of *E. alba* at 260 nm.

| SI No | Retention # Time | Peak Area | RRT *                 |
|-------|------------------|-----------|-----------------------|
| 1     | 0.88             | 394.80    | 0.08                  |
| 2     | 1.26             | 279.44    | 0.11                  |
| 3     | 2.05             | 79.65     | 0.18                  |
| 4     | 2.47             | 146.84    | 0.21                  |
| 5     | 10.48            | 54.18     | 0.91                  |
| 6     | 11.04            | 551.71    | 0.95                  |
| 7     | 11.56            | 5.82      | 1.00 (Eclalbasaponin) |
| 8     | 12.13            | 2913.02   | 1.05 (Wedelolactone)  |
| 9     | 12.50            | 4.60      | 1.08                  |
| 10    | 14.74            | 4.84      | 1.28                  |
| 11    | 21.88            | 43.56     | 1.89                  |
| 12    | 26.51            | 72.57     | 2.29                  |
| 13    | 29.81            | 53.75     | 2.58                  |
| 14    | 31.25            | 135.73    | 2.70                  |
| 15    | 33.13            | 5.84      | 2.87                  |
| 16    | 34.18            | 27.01     | 2.96                  |
| 17    | 36.35            | 2.10      | 3.14                  |
| 18    | 50.60            | 148.59    | 4.38                  |
| 19    | 51.03            | 47.97     | 4.41                  |
| 20    | 51.33            | 380.83    | 4.44                  |
| 21    | 53.08            | 115.23    | 4.59                  |

RRT \*: Relative retention time with respect to Eclalbasaponin, #: The Sample chromatogram subtracted from blank.
